# Supplementary material for: Integrated transcriptome and metabolome revealed the drought responsive metabolic pathways in Oriental Lily (Lilium L.)
Source: PeerJ. 2023 Dec 18;11:e16658. doi: 10.7717/peerj.16658 (PMC10734436; doi:10.7717/peerj.16658)
Supplement: Supplemental Information 1 [file peerj-11-16658-s001.docx]

Table 1 The effects of ck and drought on growth and leaf morphology of lily

| Time/day | Leaf lenght/cm | Leaf width/cm | lenght/widt ratio | Leaf area |
| --- | --- | --- | --- | --- |
| 10 | 0a | 0a | 0a | 0a |
| 0a | 0a | 0a | 0a |
| 15 | 6.2a | 1.42a | 4.36a | 7.28a |
| 4.8b | 1.23b | 3.91b | 4.36b |
| 20 | 7.8a | 1.51a | 5.16a | 11.51a |
| 6.1b | 1.24b | 4.35b | 7.03b |
| 25 | 8.5a | 1.52a | 5.58a | 13.66a |
| 6.9b | 1.24b | 4.73b | 8.49b |

Note: Different lowercase letters indicate a significant difference (P <0.05).

Table 2 Statistics of in vitro leaf water loss rate of wild-type and transgenic plant lines.

| Time | 0 | 2 | 4 | 6 | 8 | 10 | 12 |
| --- | --- | --- | --- | --- | --- | --- | --- |
| ck | 0.00b | 0.35b | 0.70 b | 0.81b | 0.85b | 0.92a | 0.95 a |
| TRINITY_DN2608-2 | 0.00a | 0.44a | 0.78a | 0.87a | 0.90a | 0.94a | 0.96a |
| TRINITY_DN2608-3 | 0.00a | 0.45a | 0.79a | 0.86a | 0.89a | 0.93a | 0.95a |
| TRINITY_DN2608-4 | 0.00a | 0.43a | 0.76a | 0.87a | 0.88a | 0.93a | 0.94a |
