# Supplementary material for: Integrated transcriptome and metabolome revealed the drought responsive metabolic pathways in Oriental Lily (Lilium L.)
Source: PeerJ. 2023 Dec 18;11:e16658. doi: 10.7717/peerj.16658 (PMC10734436; doi:10.7717/peerj.16658)
Supplement: Supplemental Information 3 [file peerj-11-16658-s003.xlsx]

## Sheet: RAW DATE
Representative samples leaf lenght of lily under normal
	10	15	20	25
1	0	6.4	7.9	8.6
2	0	6.2	7.8	8.5
3	0	6.1	7.7	8.4
4	0	6.2	8	8.5
5	0	6.1	7.7	8.4
10, 15, 20, 25:		On the 10th 15th 20th 25th day of lily growth
1-5: the number of Representative sample ，This means 5 repetitions
Representative samples leaf lenght of lily under drought
	10	15	20	25
1	0	5.9	6.2	6.8
2	0	5.8	6.1	6.7
3	0	5.7	6	6.6
4	0	5.7	6.3	6.7
5	0	5.8	6.1	6.6
10, 15, 20, 25:		On the 10th 15th 20th 25th day of lily growth
1-5: the number of Representative sample ，This means 5 repetitions
Representative samples leaf width of lily under normal
	10	15	20	25
1	0	1.43	1.53	1.54
2	0	1.4	1.5	1.52
3	0	1.42	1.51	1.51
4	0	1.41	1.51	1.53
5	0	1.4	1.52	1.52
10, 15, 20, 25:		On the 10th 15th 20th 25th day of lily growth
1-5: the number of Representative sample ，This means 5 repetitions
Representative samples leaf width of lily under drought
	10	15	20	25
1	0	1.31	1.41	1.41
2	0	1.3	1.4	1.4
3	0	1.29	1.39	1.39
4	0	1.29	1.39	1.4
5	0	1.3	1.41	1.41
10, 15, 20, 25:		On the 10th 15th 20th 25th day of lily growth
1-5: the number of Representative sample ，This means 5 repetitions
Representative samples leaf lenght-width of lily under normal
	10	15	20	25
1	0	4.44	5.16	5.58
2	0	4.43	5.22	5.59
3	0	4.41	5.1	5.56
4	0	4.4	5.14	5.55
5	0	4.43	5.12	5.52
10, 15, 20, 25:		On the 10th 15th 20th 25th day of lily growth
1-5: the number of Representative sample ，This means 5 repetitions
Representative samples leaf lenght-width ratio of lily under drought
	10	15	20	25
1	0	4.38	4.39	4.8
2	0	4.36	4.35	4.7
3	0	4.37	4.31	4.7
4	0	4.41	4.51	4.8
5	0	4.46	4.35	4.7
10, 15, 20, 25:		On the 10th 15th 20th 25th day of lily growth
1-5: the number of Representative sample ，This means 5 repetitions
Representative samples leaf area of lily under normal
	10	15	20	25
1	0	7.56	11.79	13.98
2	0	7.26	11.5	13.66
3	0	7.03	11.21	13.33
4	0	7.31	12.11	13.62
5	0	7.06	11.44	13.33
10, 15, 20, 25:		On the 10th 15th 20th 25th day of lily growth
1-5: the number of Representative sample ，This means 5 repetitions
Representative samples leaf area of lily under drought
	10	15	20	25
1	0	6.58	7.26	8.74
2	0	6.36	7.03	8.49
3	0	6.14	6.8	8.23
4	0	6.22	7.52	8.44
5	0	6.33	7.23	8.63
10, 15, 20, 25:		On the 10th 15th 20th 25th day of lily growth
1-5: the number of Representative sample ，This means 5 repetitions
Statistics of in vitro leaf water loss rate of wild-type and transgenic plant lines.
		0	2	4	6	8	10	12
wt	1	0	0.35	0.7	0.81	0.85	0.92	0.95
	2	0	0.32	0.68	0.83	0.86	0.91	0.93
	3	0	0.36	0.73	0.8	0.85	0.91	0.95
	4	0	0.33	0.7	0.8	0.83	0.9	0.94
	5	0	0.33	0.72	0.79	0.85	0.92	0.95
OE-2	1	0	0.44	0.78	0.87	0.9	0.94	0.96
	2	0	0.49	0.8	0.89	0.92	0.95	0.97
	3	0	0.42	0.77	0.86	0.89	0.94	0.98
	4	0	0.45	0.77	0.86	0.92	0.92	0.97
	5	0	0.47	0.76	0.88	0.9	0.95	0.96
OE-3	1	0	0.45	0.79	0.86	0.89	0.93	0.95
	2	0	0.47	0.8	0.84	0.9	0.9	0.96
	3	0	0.43	0.76	0.87	0.9	0.93	0.96
	4	0	0.43	0.79	0.87	0.87	0.94	0.94
	5	0	0.45	0.78	0.85	0.88	0.92	0.94
OE-4	1	0	0.43	0.76	0.87	0.88	0.93	0.94
	2	0	0.42	0.77	0.84	0.86	0.93	0.95
	3	0	0.43	0.74	0.88	0.89	0.91	0.93
	4	0	0.45	0.76	0.86	0.87	0.94	0.94
	5	0	0.42	0.75	0.86	0.88	0.93	0.95
0-12detached leaves after0h、2h、4h、6h、8h、10h、12h.
